# **Functional evolution of a bark beetle odorant receptor clade detecting monoterpenoids of different ecological origins**

Xiao-Qing Hou<sup>1</sup>, Jothi Kumar Yuvaraj<sup>1</sup>, Rebecca E. Roberts<sup>1</sup>, C. Rikard Unelius<sup>2</sup>, Christer Löfstedt<sup>1</sup>, Martin N. Andersson<sup>1\*</sup>

<sup>1</sup>Department of Biology, Lund University, Lund, Sweden

<sup>2</sup> Faculty of Health and Life Sciences, Linnaeus University, Kalmar, Sweden

\*Corresponding author: Martin N. Andersson

Department of Biology, Sölvegatan 37, 223 62 Lund, Sweden.

Email: [martin\\_n.andersson@biol.lu.se](mailto:martin_n.andersson@biol.lu.se)

Phone: +46-(0)462229344

## Abstract

Insects detect odors using an array of odorant receptors (ORs), which may expand through gene duplication. How specificities evolve and new functions arise in related ORs within a species remain poorly investigated. We addressed this question by functionally characterizing ORs from the Eurasian spruce bark beetle *Ips typographus*, in which antennal detection and behavioral responses to pheromones, volatiles from host and non-host trees, and fungal symbionts are well described. In contrast, knowledge of OR function is restricted to two receptors detecting the pheromone compounds (*S*)-(-)-ipsenol (ItypOR46) and (*R*)-(-)-ipsdienol (ItypOR49). These receptors belong to a species-specific OR-lineage comprising seven ItypORs. To gain insight into the functional evolution of related ORs, we characterized the five remaining ORs in this clade, using *Xenopus* oocytes. Two receptors responded primarily to the host tree monoterpenes (+)-3-carene (ItypOR25) and *p*-cymene (ItypOR27). Two receptors responded to oxygenated monoterpenoids mainly produced by the beetle-associated fungi, with ItypOR23 specific for (+)-*trans*-(1*R*,4*S*)-4-thujanol, and ItypOR29 responding to (+)-isopinocampone and similar ketones. ItypOR28 responded to the pheromone *E*-myrcenol from the competitor *Ips duplicatus*. Overall, the OR responses match well with those of previously characterized olfactory sensory neuron classes except that neurons detecting *E*-myrcenol have not been identified. Our results showing shared OR-specificity for monoterpenoid compounds is in line with ‘Sensory Drive’ predicting that evolutionarily related ORs are likely to detect structurally similar odorants. However, the variation in functional groups among OR ligands and their diverse ecological origins suggest that neofunctionalization has also taken place during the evolution of this OR-lineage.

## Key words

Odorant receptors, *Xenopus* oocytes, Host plant volatiles, Aggregation pheromone, Olfactory sensory neuron, Functional characterization.

## Introduction

Olfaction is of utmost importance to the ecology of insects, with odors mediating fitness-related activities such as mate choice and the search for food and oviposition sites, and maintenance of symbioses with microbes (Hansson and Stensmyr, 2011; Andersson et al., 2015; Fleischer et al., 2018; Kandasamy et al., 2019). Odors are detected by an expansive gene family encoding odorant receptors (ORs), which are expressed in the olfactory sensory neurons (OSNs) in the insect antennae (Clyne et al., 1999). As such, the ORs are crucial to insect life and they underlie the diverse chemical ecologies, adaptations, niche specializations, and evolutionary divergence seen in the Insecta class, which dominates most habitats of our planet. Yet, the functional evolution of this gene family is poorly understood (but see e.g., Ramdya and Benton, 2010; de Fouchier et al., 2017; Yuvaraj et al., 2017; Guo et al., 2020), and little is known with regards to how new functions evolve in these receptors, especially in non-model insects. This applies to both the molecular mechanics that underlie specificity changes (but see Leary et al., 2012; Hopf et al., 2015; Yuvaraj et al., 2020) and the ecological selection pressures that drive the evolution of the ORs.

The ‘Sensory Drive’ hypothesis suggests that sensory communication is biased by habitat choice (Endler, 1992), with natural selection favoring signals that are easy to detect by the

intended receivers (Boughman, 2002). If or how this may be reflected in the evolution of odor specificities amongst the diverse insect ORs, however represents an unexplored territory of research. Because new OR genes originate through gene duplication (Nei et al., 2008), one might speculate in the light of sensory drive that duplicated “offspring” OR paralogues may adopt similar functions as their “parent” ORs, i.e., detecting chemically similar compounds because they are ‘easy to detect’. In this study, we aimed to shed light on this question by characterizing the function of OR paralogues within a species-specific OR-radiation from the Eurasian spruce bark beetle *Ips typographus* L. (Coleoptera; Curculionidae; Scolytinae).

As keystone species in forest ecosystems, bark beetles play an important role in the decomposition of wood and recycling of nutrients (Edmonds and Eglitis, 1989; Raffa et al., 2016). However, a minority of bark beetle species are able to kill healthy trees during outbreak periods, which has become an increasing threat to conifer forests, causing great economic loss (Raffa, 2001; Kausrud et al., 2011; Raffa et al., 2016; Biedermann et al., 2019). In Eurasia, *I. typographus* is considered the most serious pest of Norway spruce (*Picea abies*) (Økland and Bjørnstad, 2003). When *I. typographus* population density surpasses a critical threshold, the defense of healthy trees can be overcome through mass-attacks and entire forest landscapes can be quickly transformed (Wyatt, 2014; Raffa et al., 2016). The mass-attacks are coordinated by a male-produced aggregation pheromone consisting of (4*S*)-*cis*-verbenol and 2-methyl-3-buten-2-ol, attracting both sexes (Schlyter et al., 1987). The attraction is, however, inhibited by several other pheromone compounds produced by *I. typographus* during the later attack phases or by heterospecific beetles, including *E*-myrcenol and specific enantiomers of verbenone, ipsenol, and ipsdienol (Francke et al., 1980; Birgersson et al., 1984; Schlyter et al., 1989; 1992).

In addition to the beetle-produced semiochemicals, the pheromone attraction is modulated by volatiles from non-host trees and defense compounds from the host (Zhang and Schlyter, 2004; Andersson et al., 2010; Schiebe et al., 2012; Binyameen et al., 2014; Unelius et al., 2014). In addition, recent laboratory studies have demonstrated the importance of volatiles in the maintenance of symbioses between *I. typographus* and its fungal associates, with beetle preferences for certain fungi being mediated via olfactory cues (Kandasamy et al., 2019). Once inoculated in a tree, these fungi may provide nutrients to beetles by direct feeding (Kandasamy et al., 2019), metabolize host tree defenses (Kandasamy, 2019), and possibly accelerate tree death (Horntvedt et al., 1983). Extensive efforts have been undertaken to understand the ecological roles of *I. typographus*-associated compounds and to characterize the OSNs that specifically detect them. To date, a total 23 OSN classes have been reported. The key ligands of these neurons include pheromone compounds from conspecific and heterospecific bark beetles, volatiles from host and non-host plants, and compounds produced by fungal symbionts (Mustaparta et al., 1984; Tømmerås et al., 1984; Tømmerås, 1985; Andersson et al., 2009; Andersson 2012; Raffa et al., 2016; Kandasamy, 2019; Kandasamy et al., 2019; Schiebe et al., 2019; Zhao et al., 2019).

The odor selectivity of an OSN depends on the characteristics of the OR that is expressed in that neuron. Hence, functional characterization of ORs is important for understanding the evolution of olfactory specialization. Despite being the largest insect order, functional information of ORs from Coleoptera is, however, limited compared with moths (e.g., Grosse-Wilde et al., 2007; Zhang and Löfstedt, 2015; Zhang et al., 2016; de Fouchier et al., 2017; Guo et al., 2020), flies (Hallem and Carlson, 2006; Mansourian and Stensmyr, 2015) and mosquitoes (Carey et al., 2010; Wang et al., 2010). To our knowledge, only seven beetle ORs have been characterized so far, of which two belong to *I. typographus* (Antony et al., 2020; Mitchell and Andersson 2020; Yuvaraj et al., 2020; Wang et al., 2020). In our previous study, the two *I. typographus* ORs (ItpOR46 and ItpOR49), responded specifically to the pheromone

compounds (*S*)-(-)-ipsenol and (*R*)-(-)-ipsdienol respectively (Yuvaraj et al., 2020). These ORs are part of an *Ips*-specific OR-lineage radiation comprising seven ORs (Yuvaraj et al., 2020). This radiation is present within the coleopteran OR subfamily named Group 7, which is highly expanded in the Curculionidae family (Andersson et al., 2013; Andersson et al., 2019; Mitchell et al., 2020). The other five ORs (ItpOR23, OR25, OR27, OR28 and OR29) in this clade did not respond to any stimulus when tested in HEK293 cells, and this was likely due to insufficient protein expression (Yuvaraj et al., 2020). Because this clade represents the largest highly-supported OR-radiation in the antennal transcriptome of this species and many of the OR genes are highly expressed (Yuvaraj et al., 2020), we hypothesize that these ORs have key ecological functions. Thus, targeting the five remaining ORs using a different expression system could provide information on the functional evolution of ORs in this species and also shed light on the general question of how odor specificities may evolve among OR paralogues within species-specific radiations and how their functions relate to species ecology. Hence, the primary aim of this study was to functionally characterize these five ORs using *Xenopus* oocytes and a large panel of ecologically relevant compounds. We asked whether the clade houses additional ORs specifically detecting other bark beetle pheromone compounds, or whether the ORs detect structurally similar chemicals (i.e., oxygenated monoterpenoids) of different biological origins and ecological meanings. The second aim was to link the responses of the functionally characterized ItpORs with the responses of previously identified OSN classes.

## Results

### Characteristics of the seven ORs in the *Ips*-specific clade

The five ItpORs targeted for functional characterization are part of an *Ips*-specific OR-lineage comprising seven ItpORs, and this lineage belongs to the monophyletic OR Group 7 in beetles (Mitchell et al., 2020; Yuvaraj et al., 2020). The phylogenetic relationships of these ORs and a subset of additional Group 7 ORs from *I. typographus* and the mountain pine beetle *Dendroctonus ponderosae* ('Dpon') are shown in Fig. 1A. The expression levels (relative to Orco; data from Yuvaraj et al., 2020) and proposed key ligands of the seven ItpORs (based on our oocyte recordings; see below) are shown in Fig. 1B, D. Except for ItpOR27, these OR genes are all among the top 20 (out of 73) most highly expressed OR genes in the antennae of this species (Yuvaraj et al., 2020). The pair-wise amino acid identity amongst the seven ORs ranges from 36.6 % to 49.9 % (Fig. 1C).

### ItpOR23 and ItpOR29 respond to volatiles mainly produced by fungal symbionts

Screening experiments with *Xenopus* oocytes co-expressing ItpOR23 and ItpOrco showed a primary response to (+)-*trans*-4-thujanol, and secondary responses to (±)-3-octanol, (-)-terpinene-4-ol, as well as acetophenone (Fig. 2A and B). Dose-response experiments showed that ItpOR23 is more sensitive to (+)-*trans*-4-thujanol than to the other three compounds (Fig. 2C), with this compound eliciting larger responses at each tested concentration. Two recent studies (Schiebe et al., 2019; Kandasamy, 2019) using partly overlapping odor panels characterized an OSN class specific for (+)-*trans*-4-thujanol (named OSN class tMTol), with responses very similar to those of ItpOR23 (Table 1). Although a weak secondary response to 1-octen-3-ol was observed in the OSN but not in the OR, and a weak secondary response to acetophenone in the OR but not in the OSN, the high similarity in the responses to the three best ligands suggests that ItpOR23 is likely to be the matching OR for this OSN class.

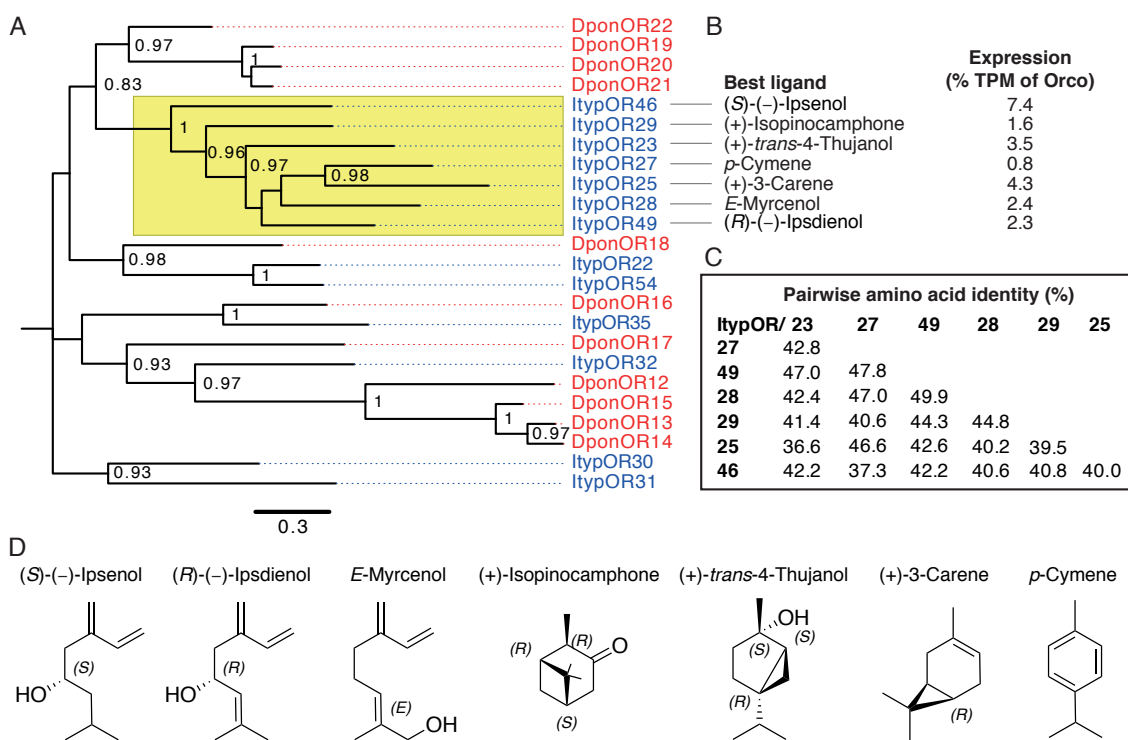

**Figure 1.** (A) Unrooted maximum likelihood phylogenetic tree showing the relationships among select Group 7 (Mitchell et al., 2020) odorant receptors (ORs) from *Ips typographus* ('ltyp'; blue) and *Dendroctonus ponderosae* ('Dpon'; red). The tree is based on a MAFFT (v7.450; Katoh et al., 2002) alignment of amino acid sequences and constructed using FastTree 2.1.11 (Price et al., 2010), implemented in Geneious Prime (2020.0.5) software (Biomatters Ltd., Auckland, New Zealand). The clade containing the seven ltypORs is highlighted in yellow. Numbers at nodes are local support values, calculated using the Shimodaira-Hasegawa (SH) test implemented in FastTree (SH values below 0.7 are not shown). (B) The primary ligands and expression levels (transcripts per million; TPM) relative to Orco of the seven *Ips*-specific ORs (data from Yuvaraj et al., 2020). (C) The pair-wise amino acid identity amongst the seven ORs, based on a MAFFT alignment. (D) Chemical structures of the main ligand for each of the seven ltypORs in the clade.

In the screening experiment, oocytes co-expressing ltypOR29 and ltypOrco responded most strongly to (+)-isopinocampnone, followed by rather strong secondary responses to the structurally similar ketones (+)-pinocampnone, (-)-pinocarvone, (-)-pinocampnone, (-)-isopinocampnone, and ( $\pm$ )-camphor (Fig. 3A and B). As a result of the thermodynamic equilibrium, both the synthesized pinocampnone enantiomers contained 16-19% impurities of the corresponding isopinocampnone enantiomers (Table S1), and these may have influenced the responses to the pinocampnones. Several additional compounds elicited weaker responses in the screening experiment (Fig. 3B). The dose-response assays confirmed that (+)-isopinocampnone is the primary ligand for this OR, although the responses elicited by the secondary ligands were also comparatively high and similar among the tested compounds (Fig. 3C). The responses of ltypOR29 are highly similar to the responses of the putatively corresponding OSN class (named OSN class Pcn; Schiebe et al., 2019; Kandasamy, 2019), with only minor discrepancies in the rank order among the secondary ligands, which are all similarly active in both systems (Table 1).

## ItpOR23

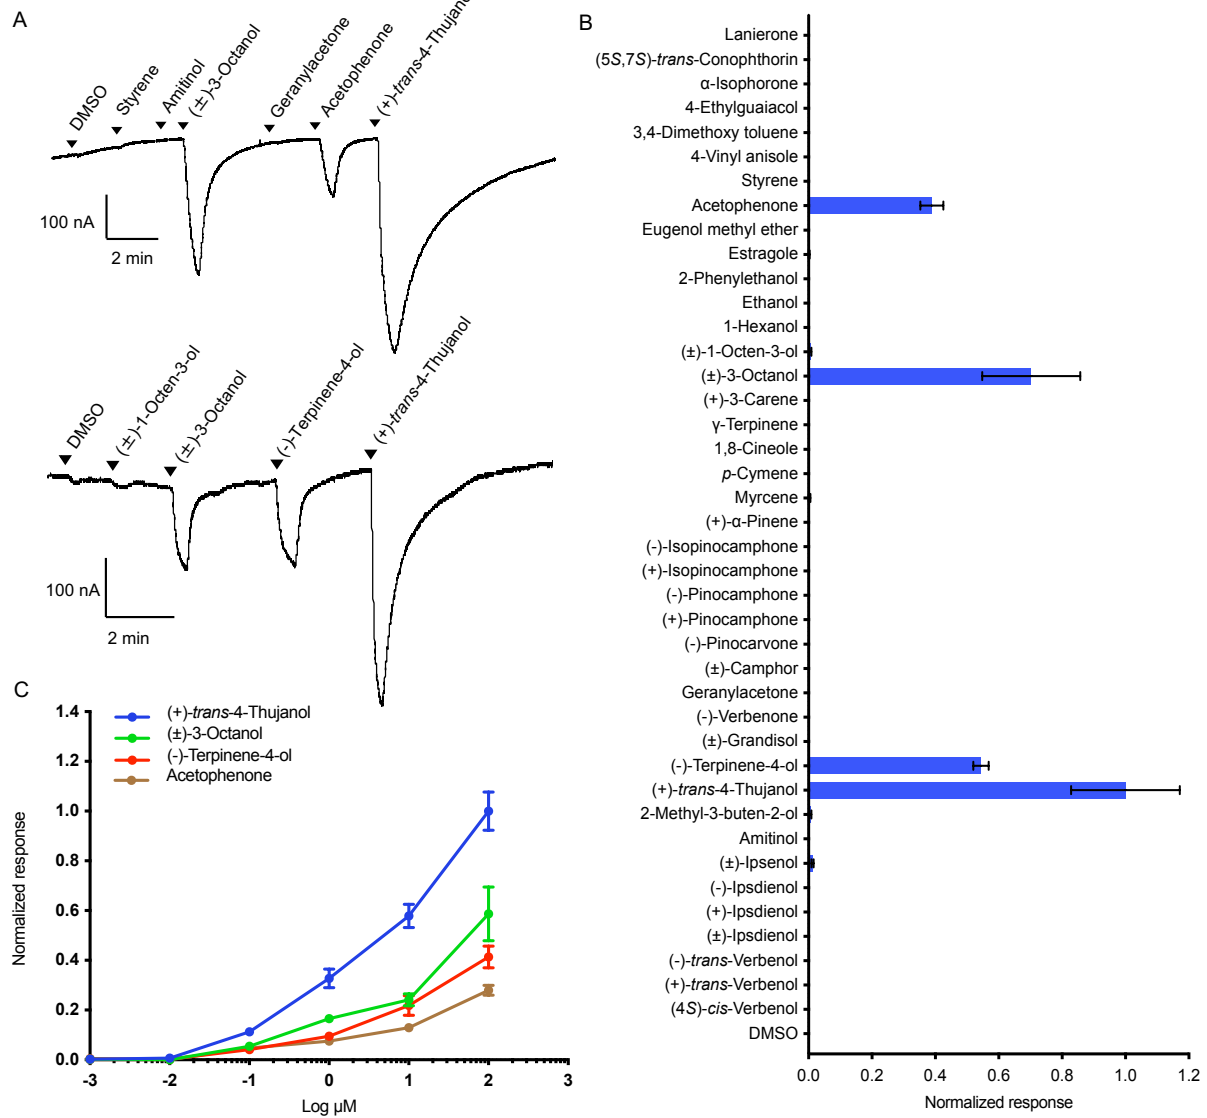

**Figure 2. Response of ItpOR23.** (A) Representative current traces of oocytes upon successive exposures to 100  $\mu$ M stimuli. Each compound was applied at the time indicated by the arrowheads for 20 s. Upper and lower traces include different sets of test stimuli. (B) Response profile of ItpOR23 to the full odor panel. Values were normalized based on the average response to the primary ligand of ItpOR23 ( $n \geq 4$ ). (C) Dose-dependent responses of oocytes expressing ItpOR23/Orco to active ligands. Values were normalized based on the average response of ItpOR23 to the most active compound at 100  $\mu$ M ( $n \geq 4$  for each ligand). Error bars indicate the SE.

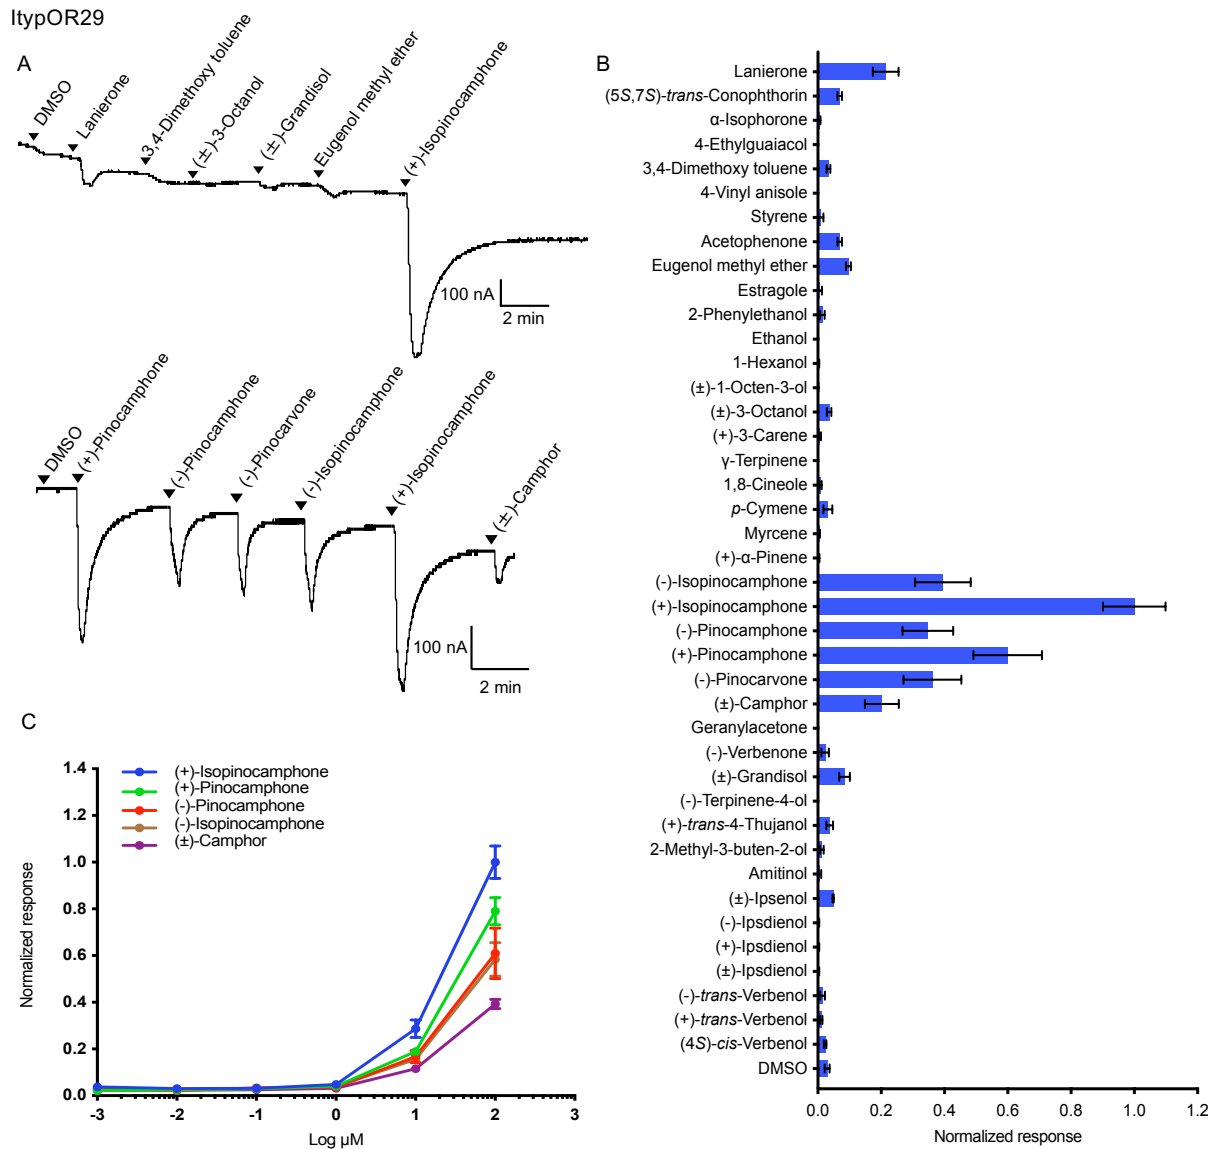

**Figure 3. Response of ItpOR29.** (A) Representative current traces of oocytes upon successive exposures to 100  $\mu\text{M}$  stimuli. Each compound was applied at the time indicated by the arrowheads for 20 s. Upper and lower traces include different sets of test stimuli. (B) Response profile of ItpOR29 to the full odor panel. Values were normalized based on the average response to the primary ligand of ItpOR29 ( $n \geq 4$ ). (C) Dose-dependent responses of oocytes expressing ItpOR29/Orco to active ligands. Values were normalized based on the average response of ItpOR29 to the most active compound at 100  $\mu\text{M}$  ( $n \geq 4$  for each ligand). Error bars indicate the SE.

### ItpOR25 and ItpOR27 respond to host plant volatiles

*Xenopus* oocytes co-expressing ItpOR25 and ItpOrco responded to several compounds in the screening experiment. The strongest response was elicited by the conifer volatile (+)-3-carene followed by the beetle-produced compound (+)-*trans*-verbenol and the non-host plant volatile 1-hexanol. Weaker, yet clear, responses were elicited primarily by lanierone and  $\alpha$ -isophorone, whereas responses to additional compounds, such as acetophenone, ( $\pm$ )-3-octanol and (+)-*trans*-4-thujanol, were minor (Fig. 4A and B). The dose-response experiments for ItpOR25 indicated a higher sensitivity to (+)-3-carene as compared to the secondary ligands (Fig. 4C). Previous SSR experiments characterized an OSN class primarily excited by 3-carene

(Andersson et al., 2009; Kandasamy, 2019). In addition, several secondary compounds are also shared between this OSN class (named OSN class  $\Delta 3$ ; Andersson et al., 2009) and ItypOR25, although the rank orders between them are partially different (Table 1).

Oocytes co-expressing ItypOR27 and ItypOrco responded strongly and similarly to the two structurally similar host plant volatiles *p*-cymene and  $\gamma$ -terpinene in the screening assays (Fig. 5A and B). A weaker response was elicited by (+)-*trans*-4-thujanol. Dose-response experiments showed that ItypOR27 displayed a slightly higher sensitivity to *p*-cymene than to  $\gamma$ -terpinene, and a lower sensitivity to (+)-*trans*-4-thujanol (Fig. 5C). Similar to this OR, the OSN class originally reported to be highly specific for *p*-cymene (named OSN class pC; Andersson et al., 2009), was recently shown to respond just slightly less to  $\gamma$ -terpinene (Schiebe et al., 2019), and weaker responses to (+)-*trans*-4-thujanol and additional compounds have also been reported (Kandasamy, 2019). Hence, our data for ItypOR27 correspond very well with OSN data reported by Schiebe et al. (2019) (Table 1), whereas several of the weakly activating compounds reported by Kandasamy (2019) were inactive in our oocyte experiments.

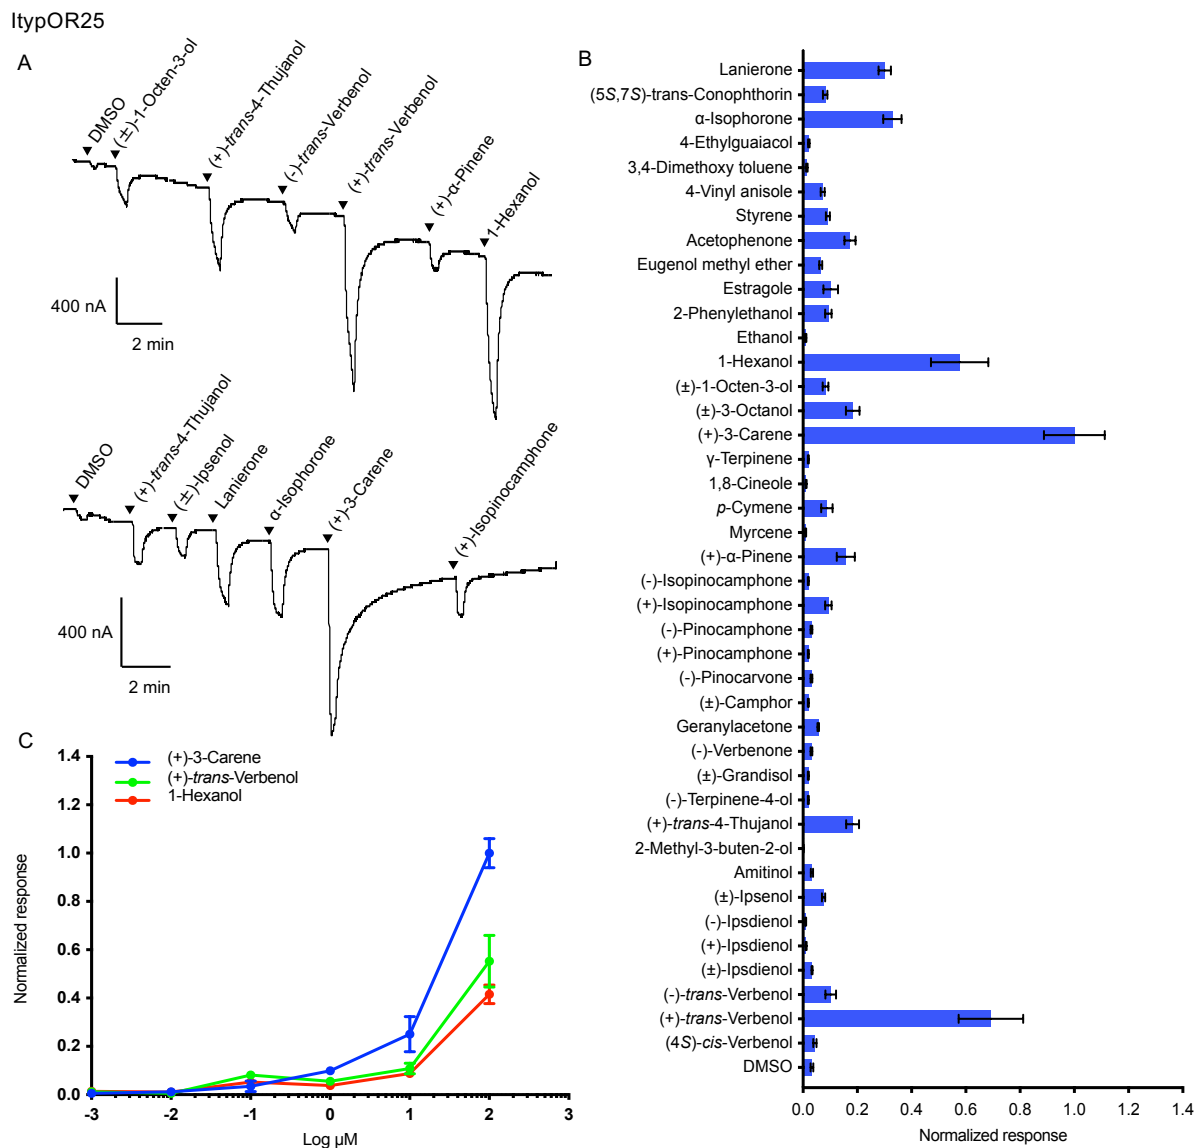



**Figure 4. Response of ItypOR25 [previous page].** (A) Representative current traces of oocytes upon successive exposures to 100  $\mu$ M stimuli. Each compound was applied at the time indicated by the arrowheads for 20 s. Upper and lower traces include different sets of test stimuli. (B) Response profile of ItypOR25 to the full odor panel. Values were normalized based on the average response to the primary ligand of ItypOR25 ( $n \geq 4$ ). (C) Dose-dependent responses of oocytes expressing ItypOR25/Orco to active ligands. Values were normalized based on the average response of ItypOR25 to the most active compound at 100  $\mu$ M ( $n \geq 4$  for each ligand). Error bars indicate the SE.

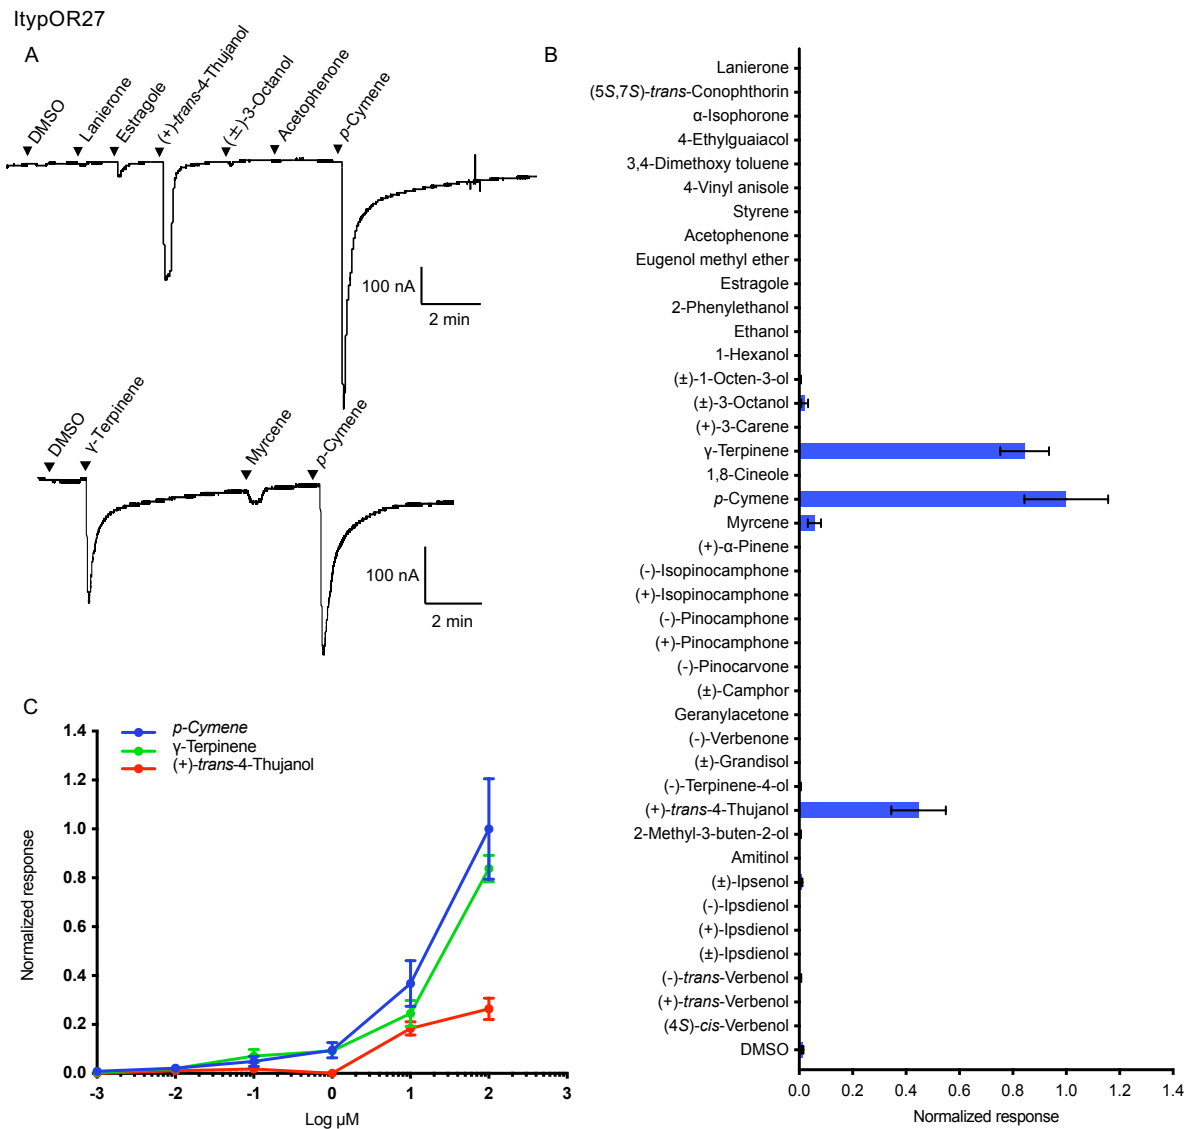

**Figure 5. Response of ItypOR27.** (A) Representative current traces of oocytes upon successive exposures to 100  $\mu$ M stimuli. Each compound was applied at the time indicated by the arrowheads for 20 s. Upper and lower traces include different sets of test stimuli. (B) Response profile of ItypOR27 to the full odor panel. Values were normalized based on the average response to the primary ligand of ItypOR27 ( $n \geq 4$ ). (C) Dose-dependent responses of oocytes expressing ItypOR27/Orco to active ligands. Values were normalized based on the average response of ItypOR27 to the most active compound at 100  $\mu$ M ( $n \geq 3$  for each ligand). Error bars indicate the SE.

## ItpOR28 responds to a pheromone component of the sympatric *I. duplicatus*

Oocytes co-expressing ItpOR28 and ItpOrco were activated by bark beetle pheromones, showing the strongest response to *E*-myrcenol in the screening experiment. *E*-myrcenol is used as an aggregation pheromone component of the competitor *I. duplicatus* (Byers et al., 1990). Secondary responses were elicited by the structurally related compounds ipsdienol and ipsenol (Fig. 6A and B). Dose-response experiments that included *E*-myrcenol, racemic ipsenol, racemic ipsdienol and its two pure enantiomers showed that the response threshold of ItpOR28 is the lowest for *E*-myrcenol, compared with that for both ipsdienol and ipsenol (Fig. 6C). An OSN responding to *E*-myrcenol in *I. typographus* has to our knowledge not been reported.

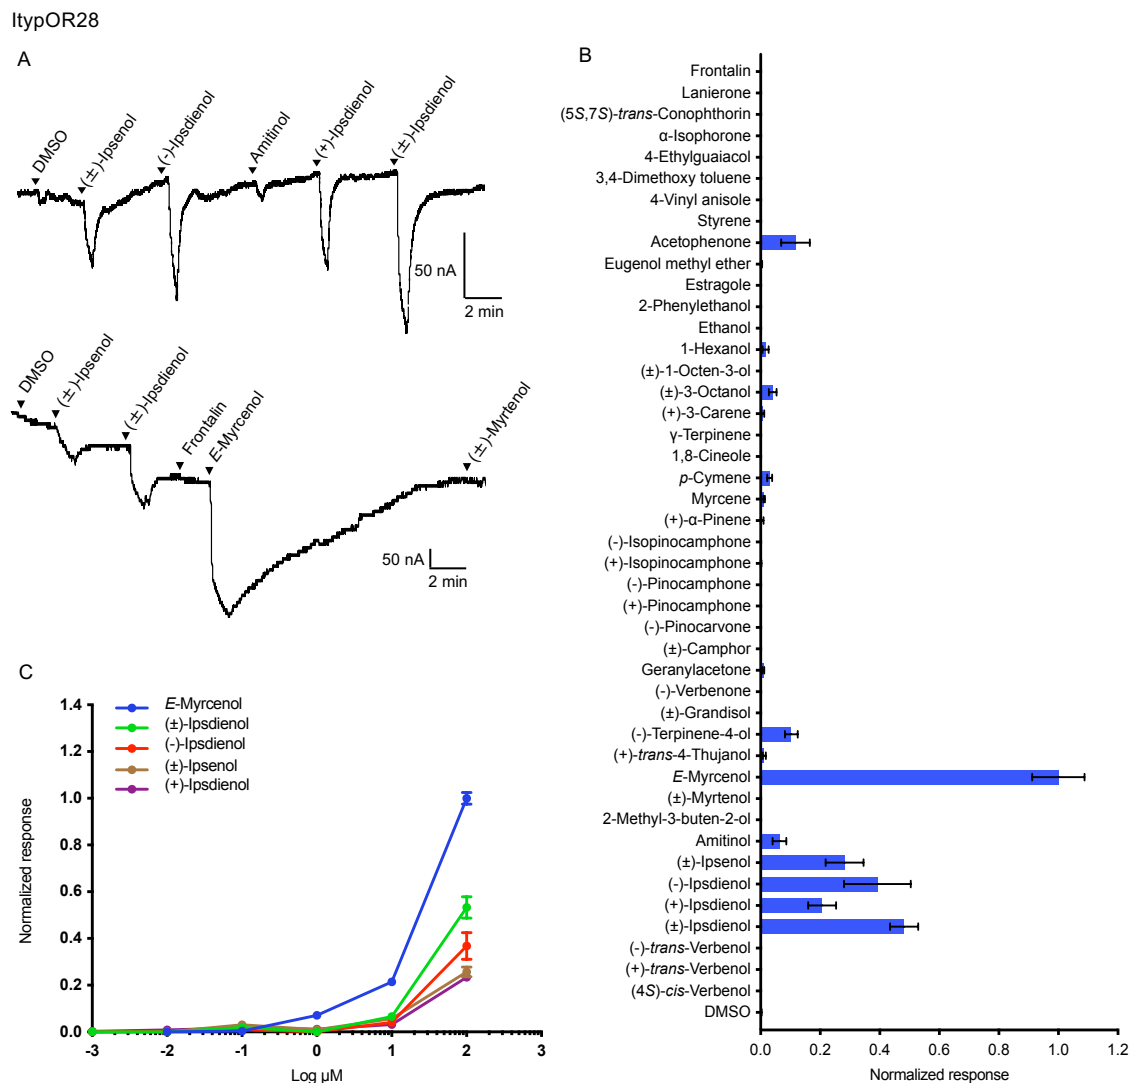

**Figure 6. Responses of ItpOR28.** (A) Representative current traces of oocytes upon successive exposures to 100  $\mu$ M stimuli. Each compound was applied at the time indicated by the arrowheads for 20 s. Upper and lower traces include different sets of test stimuli. (B) Response profile of ItpOR28 to the full odor panel. Values were normalized based on the average response to the primary ligand of ItpOR28 ( $n \geq 4$ ). (C) Dose-dependent responses of oocytes expressing ItpOR28/Orco to active ligands. Values were normalized based on the average response of ItpOR28 to the most active compound at 100  $\mu$ M ( $n \geq 4$  for each ligand). Error bars indicate the SE.

**Table 1. Comparing *in vitro* responses of odorant receptors (ORs) with OSN responses.** Rank order (1 = best compound, 2 = second best, etc.) based on response magnitude (SSR data from Tømmerås, 1985; Andersson et al., 2009; Schiebe et al., 2019; Kandasamy, 2019). Normalized responses for ItpORs in oocytes.

| Stimulus <sup>a</sup>         | Matching ORs/OSNs |           |                   |        |      |        |                |         |
|-------------------------------|-------------------|-----------|-------------------|--------|------|--------|----------------|---------|
|                               | 1                 |           | 2                 |        | 3    |        | 4 <sup>c</sup> |         |
|                               | OR23              | OSN tMTol | OR25 <sup>b</sup> | OSN Δ3 | OR27 | OSN pC | OR29           | OSN Pcn |
| (+)- <i>trans</i> -4-Thujanol | 1                 | 1         | 5                 | 2      | 2    | 2      | -              | -       |
| (-)-Terpinene-4-ol            | 2                 | 2         | -                 | -      | -    | -      | -              | -       |
| (±)-3-Octanol                 | 2                 | 2         | 5                 | -      | -    | -      | -              | -       |
| (±)-1-Octen-3-ol              | -                 | 3         | -                 | -      | -    | -      | -              | -       |
| Acetophenone                  | 3                 | -         | 5                 | 4      | -    | -      | -              | -       |
| (+)-3-Carene                  | -                 | -         | 1                 | 1      | -    | 2      | -              | -       |
| (+)- <i>trans</i> -Verbenol   | -                 | -         | 2                 | -      | -    | -      | -              | -       |
| Styrene                       | -                 | -         | 6                 | 2      | -    | -      | -              | -       |
| 1-Hexanol                     | -                 | -         | 3                 | 3      | -    | -      | -              | -       |
| <i>p</i> -Cymene              | -                 | -         | -                 | -      | 1    | 1      | -              | -       |
| $\gamma$ -Terpinene           | -                 | -         | -                 | -      | 1    | 1      | -              | -       |
| $\alpha$ -Pinene              | -                 | -         | 5                 | 4      | -    | 2      | -              | -       |
| Lanierone                     | -                 | -         | 4                 | -      | -    | -      | -              | -       |
| $\alpha$ -Isophorone          | -                 | -         | 4                 | -      | -    | -      | -              | -       |
| (+)-Isopinocampone            | -                 | -         | 6                 | 3      | -    | -      | 1              | 1       |
| (-)-Isopinocampone            | -                 | -         | -                 | -      | -    | -      | 3              | 3       |
| (+)-Pinocampone               | -                 | -         | -                 | -      | -    | -      | 2              | 2       |
| (-)-Pinocampone               | -                 | -         | -                 | -      | -    | -      | 3              | 5       |
| (-)-Pinocarvone               | -                 | -         | -                 | -      | -    | -      | 3              | 3       |
| (±)-Camphor                   | -                 | -         | 6                 | 3      | -    | -      | 4              | 4       |

Repeated number in the same column indicates similar response magnitude.

**a)** Only stimuli that were tested on both the OR and the putatively corresponding OSN class are shown.

**b)** Additional compounds eliciting minute screening responses in ItpOR25 are not listed for clarity.

**c)** Note, apart from (+)-isopinocampone which stands out as the best ligand, the secondary responses to the structurally related secondary ligands are all very similar; hence, the few discrepancies in compound rank order between the OR and OSNs are minor in terms of sensitivity.

## Discussion

### Functional evolution of the *I. typographus* OR-radiation

A recent phylogenetic analysis (Yuvaraj et al., 2020) that included the 73 antennally expressed ORs of *I. typographus* along with the ORs from the mountain pine beetle *D. ponderosae* (Andersson et al., 2019) and the Asian longhorn beetle *Anoplophora glabripennis* (Cerambycidae) (McKenna et al., 2016) revealed a highly supported clade formed by seven ItpORs. Two of these receptors (ItpOR46 and ItpOR49) were shown to selectively respond to the pheromone compounds (*S*)-(-)-ipsenol (ItpOR46) and (*R*)-(-)-ipsdienol (ItpOR49) (Yuvaraj et al., 2020). Here, we obtained functional data for the five remaining ItpORs from this clade. Collectively, our results show that this clade contains two ORs specifically tuned to monoterpene hydrocarbons produced by the host tree (ItpOR25 and ItpOR27), three ORs tuned to oxygenated monoterpenoids produced by con- or heterospecific bark beetles (i.e., pheromone compounds; ItpOR28, ItpOR46, and ItpOR49), and two ORs responding to volatiles mainly produced by the symbiotic fungi of *I. typographus* (ItpOR23 and ItpOR29).

Similar to previous suggestions (Mitchell et al., 2012; Mitchell and Andersson 2020; Yuvaraj et al., 2020), these findings strengthen the idea that pheromone receptors in beetles do not cluster in specific clades like they tend to do in Lepidoptera (Zhang and Löfstedt, 2015); instead beetle pheromone receptors are scattered in the OR phylogeny, and clades include ORs detecting compounds from various biological sources. This may not be surprising because most bark beetle pheromones are oxygenated monoterpenoids (sometimes produced through metabolism of host monoterpene defense compounds) and hence structurally similar to common host tree compounds, contrasting the situation in moths where most pheromone compounds are structurally different from plant volatiles. In addition, host- and mate localization in bark beetles is an integrated process involving pheromones, host and non-host odors, with aggregation pheromones mediating sex-attraction, aggregation behavior, and successful localization and infestation of host trees providing food.

While our functional data suggest a clade of ItypORs in which all ORs detect monoterpenes or monoterpenoids, our findings also bring up questions of how odor specificity may evolve in OR-lineage radiations. Whereas the pheromone compounds ipsenol, ipsdienol, and *E*-myrcenol are similar acyclic monoterpenols with a myrcene backbone, the other ligands for the ORs in this clade include monoterpene hydrocarbons and ketones as well as cyclic structures (Fig. 1D). In addition, previous work (Tømmerås et al., 1984; Andersson et al., 2009) identified two OSN classes primarily responding to e.g. (*S*)-(+)-ipsdienol and amitinol, respectively, which are both structurally related to the primary ligands (*S*)-(–)-ipsenol, (*R*)-(–)-ipsdienol, and *E*-myrcenol of ORs characterized here. Unexpectedly, the ORs detecting these two similar compounds are not found within this receptor lineage, and hence must have evolved their specificities independently. The same holds true for the several OSN classes specifically tuned to monoterpene hydrocarbons or oxygenated monoterpenoids (Andersson et al., 2009; Schiebe et al., 2019; Kandasamy et al., 2019), of which only four putatively corresponding ORs are localized in this clade. Hence, the observed specificities of ORs in this clade are only partly in accordance with what would be expected from the Sensory Drive hypothesis (Endler, 1992), which would suggest that related ORs should have been favored by selection to bind structurally related, ‘easy-to-detect’, molecules. On the other hand, the splits between the seven ORs appear to be rather old, as indicated by the branch lengths (Fig. 1A) and comparatively low amino acid identities (Fig. 1C), which may have provided sufficient time for significant specificity shifts (neofunctionalization) to evolve. Across several species of Lepidoptera, the structures of key ligands for characterized ORs follow the OR phylogeny at a broader scale, with ligands detected by relatively closely related ORs sharing similar molecular features (de Fouchier et al., 2017; Guo et al., 2020). But similar to our findings, there is also some variation within OR clades with respect to e.g., functional groups and unsaturation among ligands detected by related ORs. To our knowledge, our study represents a rare example where all ORs in a species-specific OR-radiation comprising as many as seven receptors have been functionally characterized. Hence, large-scale functional characterization of the OR repertoires of *I. typographus* and additional species is required to further our understanding of the functional evolution of the insect OR gene family.

### **ItypOR23 and ItypOR29 detect volatiles mainly produced by fungal symbionts**

Like other bark beetles, *I. typographus* is associated with a suite of symbiotic ophiostomatoid fungi, which beetles inoculate into the inner bark of attacked trees. These fungi may serve as food for maturing beetles (Kandasamy et al., 2019) and they also metabolize spruce defense compounds (Kandasamy, 2019). In laboratory bioassays, beetles actively seek out fungal-colonized media using olfactory cues and are able to distinguish different fungal species by

their different odor profiles using OSNs dedicated for fungal volatiles (Kandasamy et al., 2019). Here, we characterized two receptors, ItypOR23 and ItypOR29, responding to the primarily fungal-derived volatiles (+)-*trans*-4-thujanol and (+)-isopinocampone, respectively. Both of these ORs showed high response specificities to only a few structurally related compounds. The OR response profiles matched very well with those from the characterized OSNs, where the tMTol class is highly specific for (+)-*trans*-4-thujanol and the Pcn class selective for the highly similar monoterpene ketones that activate ItypOR29 (Table 1; Schiebe et al., 2019; Kandasamy, 2019).

It was recently shown that the fungi of *I. typographus* transform the host compounds (–)- $\beta$ -pinene, (–)- $\alpha$ -pinene and (–)-bornyl acetate to oxygenated monoterpenoids, including the primary and secondary ligands of both ItypOR23 and ItypOR29 (Kandasamy, 2019). In lab bioassays, (+)-*trans*-4-thujanol and camphor were attractive to adult beetles at a relatively low dose (100  $\mu$ g), however, (+)-*trans*-4-thujanol was repellent at higher doses (200  $\mu$ g to 1mg) (Blažytė-Čereškienė et al., 2016; D. Kandasamy, M. N. Andersson, A. Hammerbacher, J. Gershenzon et al., unpublished data). This suggests concentration-dependent effects of these compounds and that changes in their emission over time may be used by new incoming bark beetles to evaluate the colonization status of the host tree. In addition to production by fungi, these oxygenated monoterpenoids are also released from spruce trees, with amounts decreasing with tree age and increasing with tree stress (Blažytė-Čereškienė et al., 2016; Schiebe et al., 2019). Hence, these compounds of multiple ecological origins may be also used by *I. typographus* to assess the physiological status of host trees.

### **ItypOR25 and ItypOR27 are tuned to host plant volatiles**

ItypOR25 and OR27 were most sensitive to two host monoterpenes, (+)-3-carene and *p*-cymene, respectively, and especially ItypOR27 demonstrated a high specificity. These two ORs group together within the analyzed OR clade and present the most recent split among the seven ORs, which is in line with a tuning shift from detecting oxygenated monoterpenoids to monoterpene hydrocarbons. Despite this shared characteristic, the response profiles of the two ORs are widely different suggesting that neofunctionalization has been favored also after their presumed duplication (Rastogi and Liberles, 2005; Andersson et al., 2015). Whereas the response profile of ItypOR27 matches very well with that of the pC OSN class, ItypOR25 presented a worse match with a broader response profile and partly different rank orders among the secondary compounds compared to the putatively corresponding  $\Delta$ 3 OSN class (Table 1; Andersson et al., 2009; Schiebe et al., 2019). It remains unknown whether this discrepancy is due to the artificial oocyte environment or whether ItypOR25 is not the receptor of the  $\Delta$ 3 OSN class. However, differences in OR responses between different *in vitro* systems and between these systems and the OSNs have repeatedly been found in previous studies, including for ItypOR46 and ItypOR49 and corresponding OSN classes (Yuvaraj et al., 2017; Yuvaraj et al., 2020; Hou et al., 2020). Because of this system-dependency and since no other OSN in *I. typographus* has shown a primary response to 3-carene (Andersson et al., 2009; Schiebe et al., 2019; Kandasamy, 2019; Kandasamy et al., 2019), it appears likely that ItypOR25 is indeed the receptor that corresponds to the  $\Delta$ 3 OSN class.

The roles of host monoterpenes in host selection by *I. typographus* is poorly understood and likely context-dependent. While attraction to host monoterpenes alone has not been demonstrated, the major host compounds  $\alpha$ -pinene and  $\beta$ -pinene can enhance the responses of the bark beetle to the aggregation pheromone (Erbilgin et al., 2007; Hulcr et al., 2006; Rudinsky et al., 1972). In contrast, less abundant host compounds may reduce the pheromone attraction. For example, 1,8-cineole is more abundant in resistant trees and upregulated during an attack,

and this compound has a strong antagonistic effect on pheromone attraction (Andersson et al., 2010; Schiebe et al., 2012; Binyameen et al., 2014). Similarly, *p*-cymene is increased in heavily attacked trees, and it reduced pheromone trap catch by 50% (Andersson et al., 2010). Hence, increased amounts of inducible toxic host compounds may be used by bark beetles as cues to evaluate host defense potential and/or breeding density, and may therefore represent general ‘host unsuitability’ signals (Erbilgin and Raffa, 2000; Seybold et al., 2006; Andersson et al., 2010) with context- and species-dependent effects (Saint-Germain et al., 2007; Raffa et al., 2016). To our knowledge, behavioral effects of 3-carene have not been studied in *I. typographus*. However, the amount of 3-carene in Norway spruce increases after inoculation with the *I. typographus*-associated fungus *Endoconidiophora polonica*, and this compound has been linked to conifer resistance and susceptibility to insects and fungi (Zhao et al., 2010, and references therein). In addition, 3-carene is also abundant in pine trees, including sympatric Scots pine (*Pinus sylvestris*) and it may hence be used as a host suitability cue, similar to *p*-cymene and 1,8-cineole.

### **ItypOR28, ItypOR46, and ItypOR49 detect bark beetle pheromones**

We characterized one bark beetle pheromone receptor (ItypOR28) primarily responding to *E*-myrcenol. Hence, together with the previously characterized ItypOR46 ((*S*)-(-)-ipsenol) and ItypOR49 ((*R*)-(-)-ipsdienol) (Yuvaraj et al., 2020), the targeted clade houses three pheromone receptors. The ipsenol and ipsdienol enantiomers are produced by male *I. typographus* during the later attack phases (2-6 days after boring has been initiated), and at least ipsenol inhibits the attraction to the aggregation pheromone, possibly to avoid intraspecific competition (Francke et al., 1980; Birgersson et al., 1984; Schlyter et al., 1989). *E*-myrcenol together with both enantiomers of ipsdienol comprise the aggregation pheromone of *I. duplicatus*, the largest competitor of *I. typographus* (Byers et al., 1990), and *E*-myrcenol inhibits the attraction of *I. typographus* to its aggregation pheromone (Schlyter et al., 1992). Consistent with a general high specificity of insect pheromone receptors, ItypOR28 only responded secondarily to the structurally related ipsdienol and ipsenol, and narrow tunings were also reported for ItypOR46 and ItypOR49 (Yuvaraj et al., 2020). In contrast to the four other ItypORs characterized here, no OSN class has been reported to be specific for *E*-myrcenol despite large screening efforts that included this compound (Andersson et al., 2009). Our results from ItypOR28 suggest the existence of such an OSN class, and it is possible that these OSNs have been missed because some OSN classes were recently shown to have a highly restricted spatial distribution on the *I. typographus* antenna (Kandasamy et al., 2019).

### **Concluding remarks**

We determined the function of five ORs from a species-specific clade formed by seven receptors in *I. typographus* using the *Xenopus* oocyte system. Together with the two pheromone receptors previously characterized in both HEK cells and oocytes (Yuvaraj et al., 2020), this clade contains seven ORs which all respond to monoterpenes or monoterpenoids, indicating the biological importance of such compounds to *I. typographus*. Three ORs respond to bark beetle pheromones, two ORs to host plant volatiles, and two ORs to (mainly) fungal-derived compounds. The structural similarities especially among the three key pheromonal ligands detected by ItypOR28, ItypOR46, and ItypOR49 implies that Sensory Drive theory may apply to the evolution of insect OR function within species-specific OR-radiations. In addition, the overall diversity among the key ligands for the seven receptors and their various ecological origins also suggest that neofunctionalization has been promoted during the

evolution of this OR clade. Finally, our results also indicate that the pheromone receptors of beetles do not form specific pheromone receptor clades as seen in Lepidoptera (Yuvaraj et al., 2018). Instead, beetle pheromone receptors are dispersed across the OR phylogeny, and OR-lineage radiations within species contain receptors that detect compounds of different ecological origins.

## Materials and methods

### Chemicals

The 41 compounds tested in this study are listed in Table S1- S3, alongside information of their source, purity, and examples of biological origins. The test compounds included beetle-produced pheromonal compounds, and volatiles produced by associated fungi, conifer host, and angiosperm non-host trees, including the key ligands for all known OSN classes of *I. typographus* as well as several secondary ligands for these neurons (Tömmerås, 1985; Andersson et al., 2009; Schiebe et al., 2019; Kandasamy, 2019; Kandasamy et al., 2019). Stock solutions for *Xenopus* oocyte recordings were prepared by diluting each compound to 100 mM in dimethyl sulfoxide (DMSO), which were stored at -20°C. Before each experiment, the stock solutions were diluted to desired concentration in Ringer's buffer (96 mM NaCl, 2 mM KCl, 5mM MgCl<sub>2</sub>, 0.8 mM CaCl<sub>2</sub>, 5 mM HEPES, pH 7.6) with the final stimuli containing 0.1% DMSO. Ringer's buffer containing 0.1% DMSO was used as negative control. Compounds were initially screened for receptor activity at a concentration of 100 μM, and the active compounds were subsequently tested in dose-response experiments using six doses at 10-fold increments ranging from 1 nM to 100 μM. An odor panel of 32 compounds was initially tested on all five ORs (ItypOR23, 25, 27, 28, and 29) (Table S1). After obtaining the first screening responses to this odor panel, additional OR-specific compounds (putative secondary ligands) were selected for testing based on previous data from putatively matching OSN types, which facilitated our comparisons of OR responses with those of previously characterized OSN classes (Table S2). For consistency, these nine additional compounds were also tested on the other non-target ORs over two replications (showing insignificant activity). For ItypOR28, the initial screening experiment indicated only minor and rather unspecific responses to some test compounds. Hence, we hypothesized that this OR may be tuned to a structurally related compound, and therefore also tested frontalin, *E*-myrcenol and myrtenol specifically on this OR (Table S3). Chemical structures presented in Fig. 1D were drawn using ChemDraw Professional 17.0.

### Vector construction and cRNA synthesis

Full length sequences of ItypORs and ItypOrco were amplified by PCR using gene specific primers containing flanking 5' Kozak sequence ('GCCACC') and 5' and 3' recognition sites for restriction enzymes (Table S4). The expression vectors pcDNA5/TO containing the five ItypORs (ItypOR23, 25, 27, 28, and 29) and pcDNA4/TO containing ItypOrco that were used in previous HEK293 cell assays (Yuvaraj et al., 2020) were used as templates for sub-cloning. The PCR products were analyzed on 1% TAE agarose gels, and then purified using the GeneJET Gel Extraction Kit (Thermo Fisher Scientific™). The purified fragments were ligated into the oocyte expression vector pCS2+ using T4 ligase (Thermo Fisher Scientific™) overnight at 4 °C and then transformed into TOP10 competent cells (Thermo Fisher Scientific). Positive colonies that were confirmed by colony PCR were grown in LB broth overnight with

ampicillin, and the plasmids were then extracted using the GeneJET plasmid miniprep kit (Thermo Fisher Scientific). Plasmids were Sanger sequenced on a capillary 3130xL Genetic Analyzer (Thermo Fisher Scientific, Waltham, MA, USA) using Sp6 and EBV-rev primers at the sequencing facility at the Department of Biology, Lund University. Large quantities of purified plasmids containing ItypORs and ItypOrco with correct sequences were obtained using the PureLink™ HiPure Plasmid Filter Midiprep Kit (Thermo Fisher Scientific). cRNAs of ItypORs and ItypOrco were synthesized from NotI (Promega) linearized recombinant pCS2+ plasmids using the mMACHINE SP6 transcription kit (Thermo Fisher Scientific).

### **Microinjection and two-electrode voltage clamp recordings**

Each of the five ItypORs were co-expressed with ItypOrco in *Xenopus laevis* oocytes, and two-electrode voltage clamp recordings were performed following previously described protocols (Zhang et al., 2010; Zhang and Löfstedt, 2013). In brief, oocytes were surgically collected from *X. laevis* frogs (frogs were purchased from University of Portsmouth, UK) and treated with 1.5 mg/mL collagenase (Sigma-Aldrich Co., St. Louis, MO, USA) in oocyte Ringer 2 buffer (82.5 mM NaCl, 2 mM KCl, 1mM MgCl<sub>2</sub>, 5mM HEPES, pH 7.5) at room temperature for 15-18 min. Mature healthy oocytes (stage V-VII) were co-injected with 40 ng each of candidate OR and Orco cRNAs, then incubated for 3-7 days at 18 °C in Ringer's buffer containing sodium pyruvate (550 mg/L) and gentamicin (100 mg/L). Odorant-induced whole-cell inward currents were recorded from injected oocytes in good condition using a two-electrode voltage clamp with a TEC-03BF amplifier at the holding potential of -80 mV. A computer-controlled perfusion system was employed to apply the tested compounds and Ringer's buffer to the oocyte chamber. Oocytes were exposed to compounds at a flow rate of 2 mL/min for 20 s with extensive washing with Ringer's buffer at a flow rate of 4 mL/min between stimulations to recover the current to baseline. Data were collected and analyzed using the Cellworks software (NPI Electronic GmbH, Tamm, Germany), and the responses were normalized by calculating the relative response to each active compound in relation to the average response to the most active compound.

### **Acknowledgements**

We are grateful to Dineshkumar Kandasamy, Suresh Ganji, Erika Wallin, Blanka Kalinová, Fredrik Schlyter, Anna Jirošová, and Aleš Machara for providing test compounds. We thank the Chinese Scholarship Council (CSC) for financial support of Xiaoqing Hou's PhD study. This work was also supported by grants from the Swedish Research Councils FORMAS (grants #217-2014-689 and #2018-01444 to MNA) and VR (#2017-03804 to CL), the Crafoord foundation (MNA), the Carl Trygger foundation (MNA), and the Royal Physiographic Society in Lund (RER and MNA). The study was carried out as part of the Max Planck Centre for Next Generation Chemical Ecology (nGICE).

### **Author Contributions**

MNA conceived the study. MNA, CL and X-QH designed the experiments. MNA, X-QH, RER and JKY performed the molecular work. X-QH performed the oocyte recordings. X-QH analyzed the data and drafted the manuscript with contributions from MNA and CL. CRU



synthesized biologically active compounds. All authors read and approved the final version of manuscript.

## References

- Andersson MN. 2012. Mechanisms of odor coding in coniferous bark beetles: From neuron to behavior and application. *Psyche J. Entomol.* 2012, 149572.
- Andersson MN, Grosse-Wilde E, Keeling CI, Bengtsson JM, Yuen MM, Li M, Hillbur Y, Bohlmann J, Hansson BS, Schlyter F. 2013. Antennal transcriptome analysis of the chemosensory gene families in the tree killing bark beetles, *Ips typographus* and *Dendroctonus ponderosae* (Coleoptera: Curculionidae: Scolytinae). *BMC Genomics* 14, 198.
- Andersson MN, Keeling CI, Mitchell RF. 2019. Genomic content of chemosensory genes correlates with host range in wood-boring beetles (*Dendroctonus ponderosae*, *Agrilus planipennis*, and *Anoplophora glabripennis*). *BMC Genomics* 20, 690.
- Andersson MN, Larsson MC, Schlyter F. 2009. Specificity and redundancy in the olfactory system of the bark beetle *Ips typographus*: Single-cell responses to ecologically relevant odors. *J. Insect Physiol.* 55, 556-567.
- Andersson MN, Larsson MC, Blaženec M, Jakuš R, Zhang QH, Schlyter F. 2010. Peripheral modulation of pheromone response by inhibitory host compound in a beetle. *J. Exp. Biol.* 213, 3332-3339.
- Andersson MN, Löfstedt C, Newcomb RD. 2015. Insect olfaction and the evolution of receptor tuning. *Front. Ecol. Evol.* 3, 53.
- Antony B, Johnny J, Montagné N, Jacquín-Joly E, Capoduro R, Cali K, Persaud K, Al-Saleh MA, Pain A. 2020. Pheromone receptor of the globally invasive quarantine pest of the palm tree, the red palm weevil (*Rhynchophorus ferrugineus*). bioRxiv preprint <https://doi.org/10.1101/2020.07.31.230326>.
- Økland B, Bjørnstad ON. 2003. Synchrony and geographical variation of the spruce bark beetle (*Ips typographus*) during a non-epidemic period. *Popul. Ecol.* 45, 213-219.
- Biedermann PHW, Müller J, Grégoire JC, Gruppe A, Hagge J, Hammerbacher A, et al. 2019. Bark beetle population dynamics in the Anthropocene: challenges and solutions. *Trends Ecol. Evol.* 34, 914-924.
- Binyameen M, Jankuvová J, Blaženec M, Jakuš R, Song L, Schlyter F, Andersson MN. 2014. Co-localization of insect olfactory sensory cells improves the discrimination of closely separated odor sources. *Funct. Ecol.* 28, 1216-1223.
- Birgersson G, Schlyter F, Löfqvist J, Bergström G. 1984. Quantitative variation of pheromone components in the spruce bark beetle *Ips typographus* from different attack phases. *J. Chem. Ecol.* 10, 1029-1055.
- Blažytė-Čereškienė L, Apšegaitė V, Radžiutė S, Mozūraitis R, Būda V, Pečiulytė D. 2016. Electrophysiological and behavioural responses of *Ips typographus* (L.) to *trans*-4-thujanol—a host tree volatile compound. *Ann. For. Sci.* 73, 247-256.
- Boughman JW. 2002. How sensory drive can promote speciation. *Trends Ecol. Evol.* 17, 571-577.
- Byers JA, Schlyter F, Birgersson G, Francke W. 1990. *E*-myrcenol in *Ips duplicatus*: An aggregation pheromone component new for bark beetles. *Experientia* 46, 1209-1211.
- Carey AF, Wang G, Su CY, Zwiebel LJ, Carlson JR. 2010. Odorant reception in the malaria mosquito *Anopheles gambiae*. *Nature* 464, 66-71.
- Clyne PJ, Warr CG, Freeman MR, Lessing D, Kim J, Carlson JR. 1999. A novel family of divergent seven-transmembrane proteins: candidate odorant receptors in *Drosophila*. *Neuron* 22, 327-338.
- de Fouchier A, Walker WB, Montagne N, Steiner C, Binyameen M, Schlyter F et al. 2017. Functional evolution of Lepidoptera olfactory receptors revealed by deorphanization of a moth repertoire. *Nat. Commun.* 8, 15709.

- Edmonds RL, Eglitis A. 1989. The role of the Douglas-fir beetle and wood borers in the decomposition of and nutrient release from Douglas-fir logs. *Can. J. For. Res.* 19, 853-859.
- Endler JA. 1992. Signals, signal conditions, and the direction of evolution. *Am. Nat.* 139, S125-S153.
- Erbilgin N, Krokene P, Kvamme T, Christiansen E. 2007. A host monoterpene influences *Ips typographus* (Coleoptera: Curculionidae Scolytinae) responses to its aggregation pheromone. *Agric. For. Entomol.* 9, 135-140.
- Erbilgin N, Raffa KF. 2000. Opposing effects of host monoterpenes on responses by two sympatric species of bark beetles to their aggregation pheromones. *J. Chem. Ecol.* 26, 2527-2548.
- Fleischer J, Pregitzer P, Breer H, Krieger J. 2018. Access to the odor world: olfactory receptors and their role for signal transduction in insects. *Cell. Mol. Life Sci.* 75, 485-508.
- Francke W, Sauerwein P, Vité JP, Klimetzek D. 1980. The pheromone bouquet of *Ips amitinus*. *Naturwissenschaften* 67, 147-148.
- Grosse-Wilde E, Gohl T, Bouche E, Breer H, Krieger J. 2007. Candidate pheromone receptors provide the basis for the response of distinct antennal neurons to pheromonal compounds. *Eur. J. Neurosci.* 25, 2364-2373.
- Guo M, Du L, Chen Q, Feng Y, Zhang J, Zhang X, Tian K, Cao S, Huang T, Jacquín-Joly E, Wang G, Liu Y. 2020. Odorant receptors for detecting flowering plant cues are functionally conserved across moths and butterflies. *Mol. Biol. Evol.* doi:10.1093/molbev/msaa300.
- Halle EA, Carlson JR. 2006. Coding of odors by a receptor repertoire. *Cell* 125, 143-160.
- Hansson BS, Stensmyr MC. 2011. Evolution of insect olfaction. *Neuron* 72, 698-711.
- Hopf TA, Morinaga S, Ihara S, Touhara K, Marks DS, Benton R. 2015. Amino acid coevolution reveals three-dimensional structure and functional domains of insect odorant receptors. *Nat. Commun.* 6, 6077.
- Horntvedt R, Christiansen E, Solheim H, Wang S. 1983. Artificial inoculation with *Ips typographus*-associated blue stain fungi can kill healthy Norway spruce trees. *Medd. Nor. Inst. Skogforsk.* 38, 1-20.
- Hou X, Zhang DD, Yuvaraj JK, Corcoran JA, Andersson MN, Löfstedt C. 2020. Functional characterization of odorant receptors from the moth *Eriocrania semipurpurella*: a comparison of results in the *Xenopus* oocyte and HEK cell systems. *Insect Biochem. Mol. Biol.* 117, 103289.
- Hulcr J, Ubik K, Vrkoc J. 2006. The role of semiochemicals in tritrophic interactions between the spruce bark beetle *Ips typographus*, its predators and infested spruce. *J. Appl. Entomol.* 130, 275-283.
- Kandasamy D. 2019. Chemical interactions between the spruce bark beetle (*Ips typographus*), its host tree (*Picea abies*), and its fungal associates. PhD Thesis; Friedrich-Schiller-Universität, Fakultät für Biowissenschaften, Jena, Germany.
- Kandasamy D, Gershenzon J, Andersson MN, Hammerbacher AV. 2019. Volatile organic compounds influence the interaction of the Eurasian spruce bark beetle (*Ips typographus*) with its fungal symbionts. *ISME J.* 13, 1788-1800.
- Katoh K, Misawa K, Kuma Ki, Miyata T. 2002. MAFFT: a novel method for rapid multiple sequence alignment based on fast Fourier transform. *Nucleic. Acids Res.* 30, 3059-3066.
- Kausrud KL, Grégoire JC, Skarpaas O, Erbilgin N, Gilbert M, Økland B, Stenseth NC. 2011. Trees wanted—dead or alive! Host selection and population dynamics in tree-killing bark beetles. *PLoS One* 6, e18274.
- Leary GP, Allen JE, Bunger PL, Luginbill JB, Linn CE, Macallister IE, Kavanaugh MP, Wanner KW. 2012. Single mutation to a sex pheromone receptor provides adaptive specificity between closely related moth species. *Proc. Natl. Acad. Sci. U.S.A.* 109, 14081-14086.
- Mansourian S, Stensmyr MC. 2015. The chemical ecology of the fly. *Curr. Opin. Neurobiol.* 34, 95-102.
- McKenna DD, Scully ED, Pauchet Y, Hoover K, Kirsch R, Geib SM, Mitchell RF, Waterhouse, RM, Ahn SJ, Arsalan D. et al. 2016. Genome of the Asian longhorned beetle (*Anoplophora glabripennis*),

- a globally significant invasive species, reveals key functional and evolutionary innovations at the beetle–plant interface. *Genome Biol.* 17, 227.
- Mitchell RF, Andersson MN. 2020. Olfactory genomics of the Coleoptera. In: Blomquist GJ, Vogt RG, editors. *Insect Pheromone Biochemistry and Molecular Biology 2nd Edition*. Academic Press, Oxford. p. 547-590.
- Mitchell RF, Hughes DT, Luetje CW, Millar JG, Soriano-Agatón F, Hanks LM, Robertson, HM. 2012. Sequencing and characterizing odorant receptors of the cerambycid beetle *Megacyllene caryae*. *Insect Biochem. Mol. Biol.* 42, 499-505.
- Mitchell RF, Schneider TM, Schwartz AM, Andersson MN, McKenna DD. 2020. The diversity and evolution of odorant receptors in beetles (Coleoptera). *Insect Mol. Biol.* 29, 77-91.
- Mustaparta H, Tømmerås BÅ, Bäckström P, Bakke JM, Ohloff G. 1984. Ipsdienol-specific receptor cells in bark beetles: structure–activity relationships of various analogues and of deuterium-labelled ipsdienol. *J. Comp. Physiol.* A154, 591-596.
- Nei M, Niiimura Y, Nozawa M. 2008. The evolution of animal chemosensory receptor gene repertoires: roles of chance and necessity. *Nat. Rev. Genet.* 9, 951-963.
- Price MN, Dehal PS, Arkin AP. 2010. FastTree2 - Approximately maximum-likelihood trees for large alignments. *PLoS One* 5, e9490.
- Raffa KF. 2001. Mixed messages across multiple trophic levels: the ecology of bark beetle chemical communication systems. *Chemoecology* 11, 49-65.
- Raffa KF, Andersson MN, Schlyter F. 2016. Host selection by bark beetles: Playing the odds in a high-stakes game. In: Tittiger C, Blomquist GJ, editors. *Advances in insect physiology*. Academic press, Oxford. Vol. 50, p. 1-74.
- Ramdaya P, Benton R. 2010. Evolving olfactory systems on the fly. *Trends Genet.* 26, 307-316.
- Rastogi S, Liberles DA. 2005. Subfunctionalization of duplicated genes as a transition state to neofunctionalization. *BMC Evol. Biol.* 5, 28.
- Rudinsky JA, Furniss MM, Kline LN, Schmitz RF. 1972. Attraction and repression of *Dendroctonus pseudotsugae* (Coleoptera: Scolytidae) by three synthetic pheromones in traps in Oregon and Idaho. *Can. Entomol.* 104, 815-822.
- Saint-Germain M, Buddle CM, Drapeau P. 2007. Primary attraction and random landing in host-selection by wood-feeding insects: a matter of scale? *Agric. For. Entomol.* 9, 227-235.
- Schiebe C, Hammerbacher A, Birgersson G, Witzell J, Brodelius PE, Gershenson J, Hansson BS, Krokene P, Schlyter F. 2012. Inducibility of chemical defenses in Norway spruce bark is correlated with unsuccessful mass attacks by the spruce bark beetle. *Oecologia* 170, 183-198.
- Schiebe C, Unelius CR, Ganji S, Binyameen M, Birgersson G, Schlyter F. 2019. Styrene, (+)-*trans*-(1*R*,4*S*,5*S*)-4-thujanol and oxygenated monoterpenes related to host stress elicit strong electrophysiological responses in the bark beetle *Ips typographus*. *J. Chem. Ecol.* 45, 474-489.
- Schlyter F, Birgersson G, Byers JA, Bakke A. 1992. The aggregation pheromone of *Ips duplicatus* and its role in competitive interactions with *I typographus* (Coleoptera: Scolytidae). *Chemoecology* 3, 103-112.
- Schlyter F, Birgersson G, Leufvén A. 1989. Inhibition of attraction to aggregation pheromone by verbenone and ipsenol. *J. Chem. Ecol.* 15, 2263-2277
- Schlyter F, Birgersson G, Byers JA, Löfqvist J, Bergström G. 1987. Field response of spruce bark beetle, *Ips typographus*, to aggregation pheromone candidates. *J. Chem. Ecol.* 13, 701-716.
- Seybold S, Huber D, Lee J, Graves AD, Bohlmann J. 2006. Pine monoterpenes and pine bark beetles: a marriage of convenience for defense and chemical communication. *Phytochem. Rev.* 5, 143-178.
- Tømmerås BÅ. 1985. Specialization of the olfactory receptor cells in the bark beetle *Ips typographus* and its predator *Thanasimus formicarius* to bark beetle pheromones and host tree volatiles. *J. Comp. Physiol.* A157, 335-342.
- Tømmerås BÅ, Mustaparta H, Gregoire JC. 1984. Receptor cells in *Ips typographus* and *Dendroctonus micans* specific to pheromones of the reciprocal genus. *J. Chem. Ecol.* 10, 759-770.

- Unelius RC, Schiebe C, Bohman B, Andersson MN, Schlyter F. 2014. Non-host volatile blend optimization for forest protection against the European spruce bark beetle, *Ips typographus*. *PLoS One* 9, e85381.
- Wang G, Carey AF, Carlson JR, Zwiebel LJ. 2010. Molecular basis of odor coding in the malaria vector mosquito *Anopheles gambiae*. *Proc. Natl. Acad. Sci. U.S.A.* 107, 4418-4423.
- Wang X, Wang S, Yi J, Li Y, Liu J, Wang J, Xi J. 2020 Three host plant volatiles, hexanal, lauric acid, and tetradecane, are detected by an antenna-biased expressed odorant receptor 27 in the dark black chafer *Holotrichia parallela*. *J. Agric. Food Chem.* 68, 7316-7323
- Wyatt TD. 2014. Coming together and keeping apart: aggregation pheromones and host-marking pheromones. In: *Pheromones and animal behavior: Chemical signals and signatures* 2nd Edition. Cambridge University Press. Cambridge. p.105-112.
- Yuvaraj JK, Andersson MN, Corcoran JA, Anderbrant O, Löfstedt C. 2018. Functional characterization of odorant receptors from *Lampronia capitella* suggests a non-ditrysian origin of the lepidopteran pheromone receptor clade. *Insect Biochem. Mol. Biol.* 100, 39-47.
- Yuvaraj JK, Corcoran JA, Andersson MN, Newcomb RD, Anderbrant O, Löfstedt C. 2017. Characterization of odorant receptors from a non-ditrysian moth, *Eriocrania semipurpurella* sheds light on the origin of sex pheromone receptors in Lepidoptera. *Mol. Biol. Evol.* 34, 2733-2746.
- Yuvaraj JK, Roberts RE, Sonntag Y, Hou XQ, Grosse-Wilde E, Machara A, Hansson BS, Johanson U, Löfstedt C, Andersson MN. 2020. Putative ligand binding sites of two functionally characterized bark beetle odorant receptors. bioRxiv preprint doi: <https://doi.org/10.1101/2020.03.07.980797>
- Zhang DD, Zhu KY, Wang CZ. 2010. Sequencing and characterization of six cDNAs putatively encoding three pairs of pheromone receptors in two sibling species, *Helicoverpa armigera* and *Helicoverpa assulta*. *J. Insect Physiol.* 56, 586-593.
- Zhang DD, Löfstedt C. 2013. Functional evolution of a multigene family: orthologous and paralogous pheromone receptor genes in the turnip moth, *Agrotis segetum*. *PLoS One* 8, e77345.
- Zhang DD, Löfstedt C. 2015. Moth pheromone receptors: gene sequences, function and evolution. *Front. Ecol. Evol.* 3, 105.
- Zhang DD, Wang HL, Schultze A, Froß H, Francke W, Krieger J, Löfstedt C. 2016. Receptor for detection of a Type II sex pheromone in the winter moth *Operohphthera brumata*. *Sci. Rep.* 6, 18576.
- Zhang QH, Schlyter F. 2004. Olfactory recognition and behavioural avoidance of angiosperm non-host volatiles by conifer bark beetles. *Agric. For. Entomol.* 6, 1-19.
- Zhao T, Krokene P, Björklund N, Långström B, Solheim H, Christiansen E, Borg-Karlson A-K. 2010. The influence of *Ceratocystis polonica* inoculation and methyl jasmonate application on terpene chemistry of Norway spruce, *Picea abies*. *Phytochemistry* 71, 1332-1341.
- Zhao T, Ganji S, Schiebe C, Bohman B, Weinstein P, Krokene P, Borg-Karlson A-K, Unelius CR. 2019. Convergent evolution of semiochemicals across Kingdoms: bark beetles and their fungal symbionts. *ISME J.* 13, 1535-1545.
